# Supplementary material for: Detection and targeting of splicing deregulation in pediatric acute myeloid leukemia stem cells
Source: PubMed Central journal article supplement — Cell Rep Med. 2023 Mar 7;4(3):100962. doi: 10.1016/j.xcrm.2023.100962 (PMC10040387; doi:10.1016/j.xcrm.2023.100962), 2023-03-07
Supplement: mmc1.pdf [file mmc1.pdf]

**Cell Reports Medicine, Volume 4**

**Supplemental information**

**Detection and targeting of splicing**

**deregulation in pediatric acute**

**myeloid leukemia stem cells**

**Inge van der Werf, Phoebe K. Mondala, S. Kathleen Steel, Larisa Balajian, Luisa Ladel, Cayla N. Mason, Raymond H. Diep, Jessica Pham, Jacqueline Cloos, Gertjan J.L. Kaspers, Warren C. Chan, Adam Mark, James J. La Clair, Peggy Wentworth, Kathleen M. Fisch, Leslie A. Crews, Thomas C. Whisenant, Michael D. Burkart, Mary E. Donohoe, and Catriona H.M. Jamieson**

Figure S1

**A**

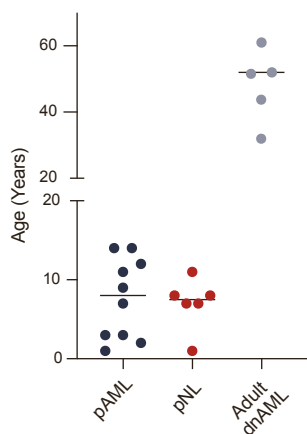

**B**

NGS Hematologic Malignancy Panel

|        |            |        |       |        |         |         |       |
|--------|------------|--------|-------|--------|---------|---------|-------|
| ABL1   | CCND1      | DDX41  | GNAS  | KLHL6  | NRAS    | RPL10   | SUZ12 |
| ASXL1  | CD79B      | DNM2   | GNB1  | KMT2A  | PAX5    | RPL5    | TET2  |
| ASXL2  | CDKN2A_p16 | DNMT1  | HRAS  | KMT2C  | PDGFRA  | RUNX1   | TLR2  |
| ATM    | CDKN2A_p14 | DNMT3A | IDH1  | KMT2D  | PDS5B   | SETBP1  | TP53  |
| ATRX   | CEBPA      | DNMT3B | IDH2  | KRAS   | PHF6    | SETD2   | TSC2  |
| BCL11B | CHEK2      | EED    | IKZF1 | LUC7L2 | PIK3CA  | SF1     | TYK2  |
| BCOR   | CNOT3      | EP300  | IKZF2 | MAP2K1 | PIM1    | SF3A1   | U2AF1 |
| BCORL1 | CREBBP     | ETNK1  | IKZF3 | MEF2B  | POT1    | SF3B1   | U2AF2 |
| BIRC3  | CRLF2      | ETV6   | IL2RG | MPL    | PPM1D   | SH2B3   | NSD2  |
| BRAF   | CSF1R      | EZH2   | IL7R  | MYD88  | PRPF40B | SMARCA4 | WT1   |
| BRCC3  | CSF3R      | FANCL  | IRF1  | NF1    | PRPF8   | SMC1A   | XPO1  |
| BTK    | CSNK1A1    | FBXW7  | JAK1  | NFE2   | PTEN    | SMC3    | ZRSR2 |
| CALR   | CTCF       | FLT3   | JAK2  | NOTCH1 | PTPN11  | SRSF2   |       |
| CBL    | CTNNB1     | GATA1  | JAK3  | NOTCH2 | RAD21   | STAG2   |       |
| CBLB   | CUX1       | GATA2  | KDM6A | NOTCH3 | RB1     | STAT3   |       |
| CBLC   | CXCR4      | GATA3  | KIT   | NPM1   | RET     | STAT5B  |       |

**Figure S1. Patient characteristics and whole exome (next generation) sequencing analyses.**

**Related to Figure 1.**

(A) Graph of the age distribution of pediatric AML (pAML), pediatric non-leukemic (pNL) and adult *de novo* AML (adult dnAML) patient samples included in this study.

(B) NGS hematologic malignancy panel of genes (n=124) developed at UC San Diego.



**Figure S2. Single cell proteogenomic detection of clonal heterogeneity in pediatric AML. Related to Figure 2.**

Single cell proteogenomic analyses of three pediatric AML (pAML) patients show DNA mutation genotype, individual cell counts in each clone, and violin plots.

(A) Patient 266. Detection of SNP variants with cell counts (left) and violin plots of immunophenotyping expression of CD34, CD38, CD7 and ROR1 are shown (right).

(B) Patient 451. Detection of SNP variants with cell counts (left) and violin plots of immunophenotyping expression of CD34, CD38, CD7 and ROR1 are shown (right).

(C) Patient 678. Detection of SNP variants with cell counts (left) and violin plots of immunophenotyping expression of CD34, CD38, CD7, and ROR1 are shown (right).

Figure S3

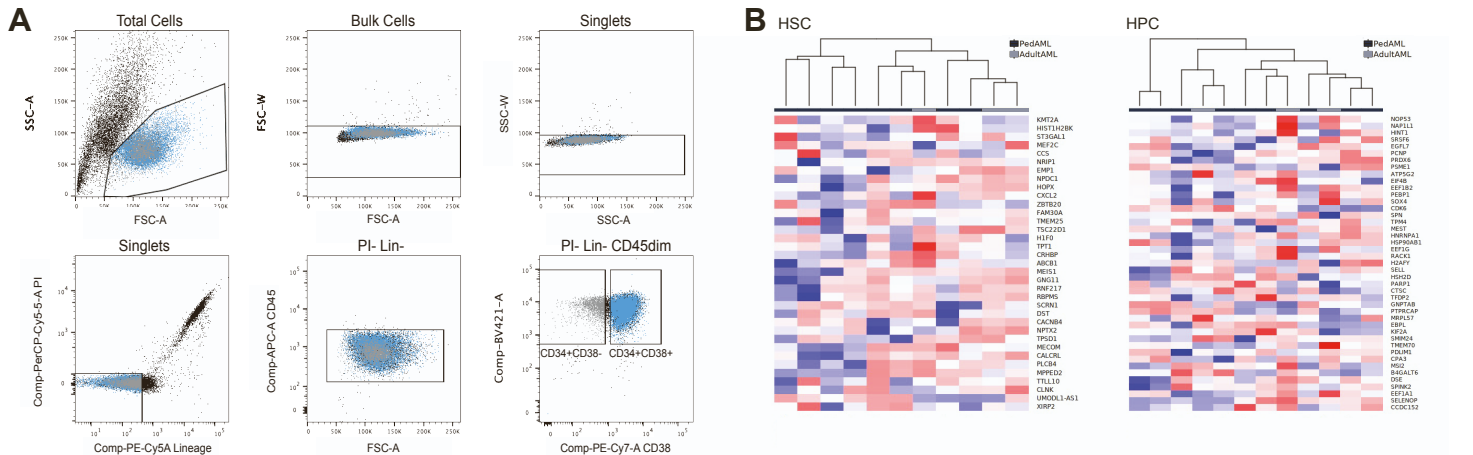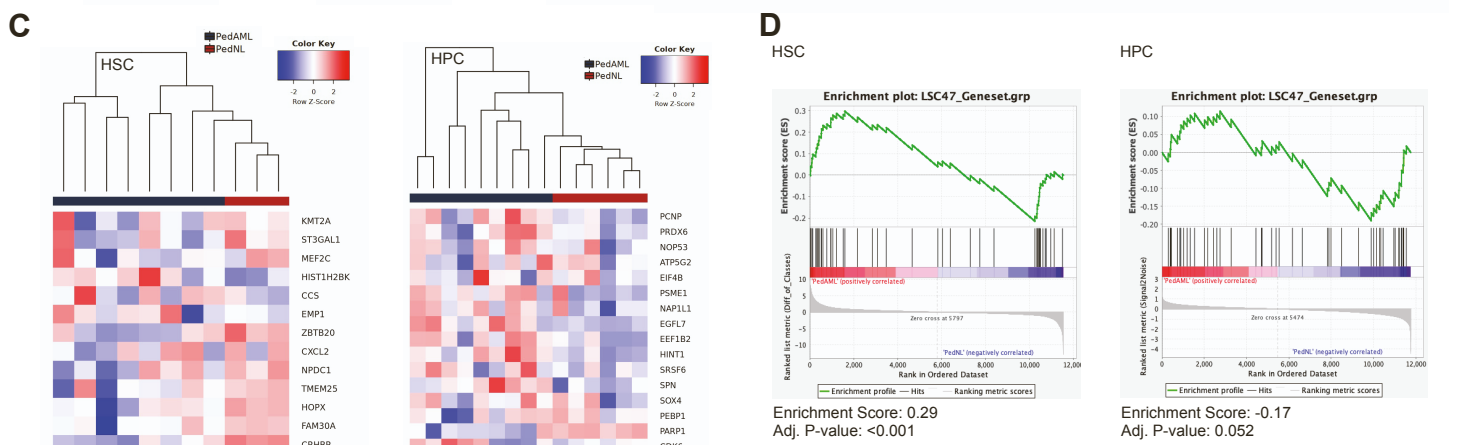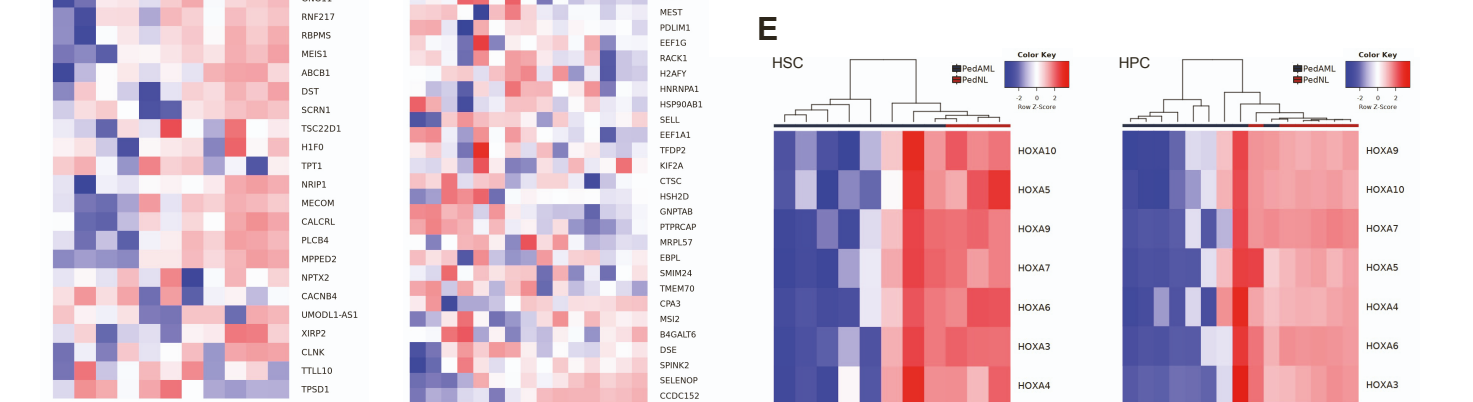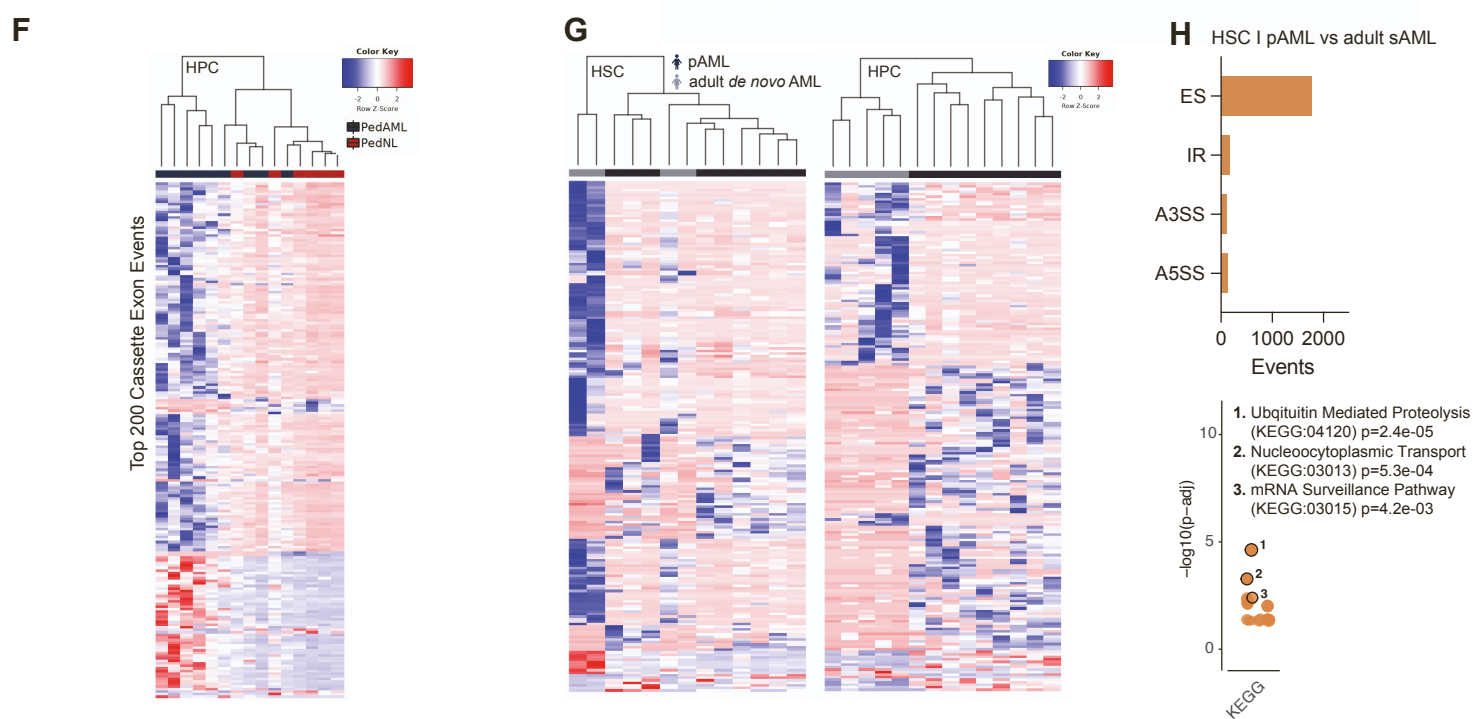

**Figure S3. RNA-sequencing based hematopoietic stem cell and hematopoietic progenitor cell gene expression patterns in pediatric AML. Related to Figure 3.**

- (A) FACS gating strategy of hematopoietic stem cells (HSCs) and hematopoietic progenitor cells (HPCs).
- (B) RNA sequencing (RNA-seq) derived heatmap of normalized gene expression levels after unsupervised hierarchical clustering of pediatric AML (pAML) versus adult *de novo* AML (dnAML) HSCs (left) and HPCs (right). Genes were selected for the heatmap based on a single-cell RNA-seq study of adult dnAML.<sup>29</sup>
- (C) Heatmap of normalized expression levels after unsupervised hierarchical clustering of pAML versus pediatric non-leukemic (pNL) HSCs (left) and HPCs (right).<sup>29</sup>
- (D) GSEA enrichment plot of the LSC47 gene signature shows significant enrichment in pAML versus age-matched non-leukemic derived HSCs (left) and HPCs (right).
- (E) Expression of HOXA genes in pAML versus age-matched non-leukemic HSCs (left) and HPCs (right). Note, LSC47 signature is based on a study in adults.
- (F) Heatmap of top 200 distinct splice isoforms in HPCs derived from pAML versus age-matched non-leukemic cells.
- (G) Heatmap of top 200 distinct splice isoforms in HSCs (left) and HPCs (right) derived from pAML adult dnAML.
- (H) Amount of differential splicing events in HSCs derived from pAML versus adult secondary AML (sAML; top). Functional enrichment analysis of HSCs derived from pediatric AML versus HSCs derived from adult sAML (bottom). Hematopoietic stem cells (HSCs); Hematopoietic progenitor cells (HPCs).

Figure S4

**A**

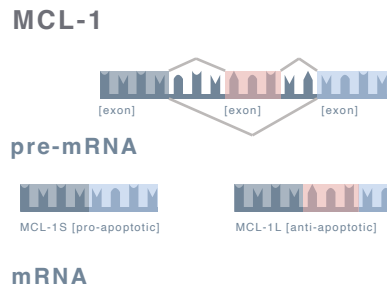

**B**

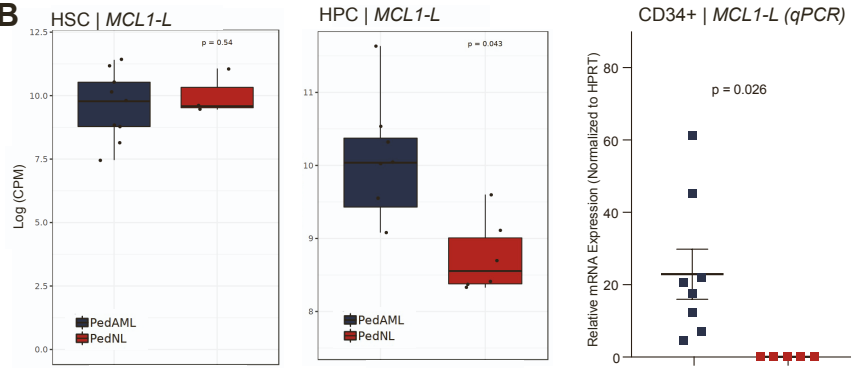

**C**

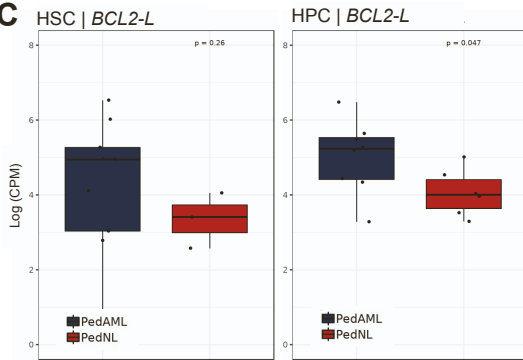

**D**

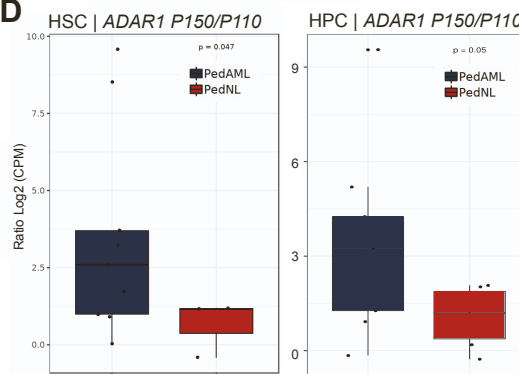

**E**

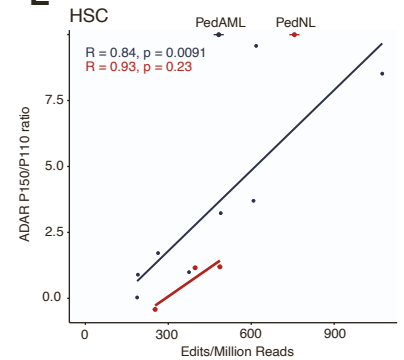

**F**

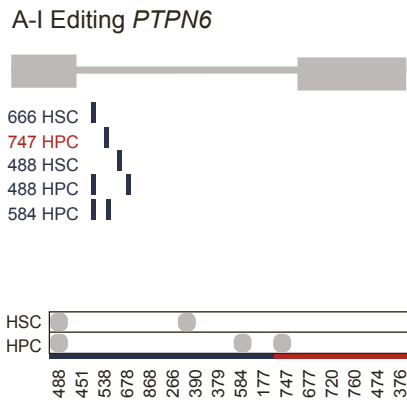

**G**

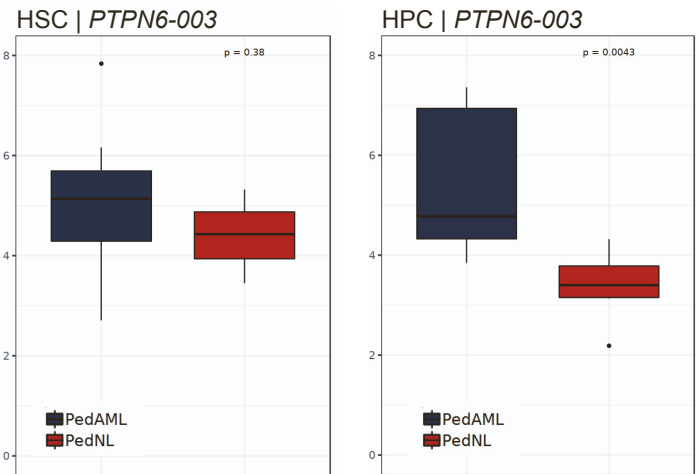

**H**

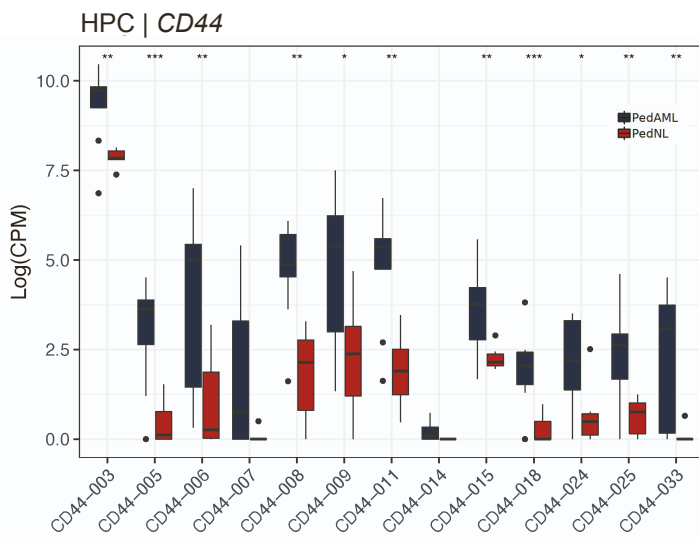

**I**

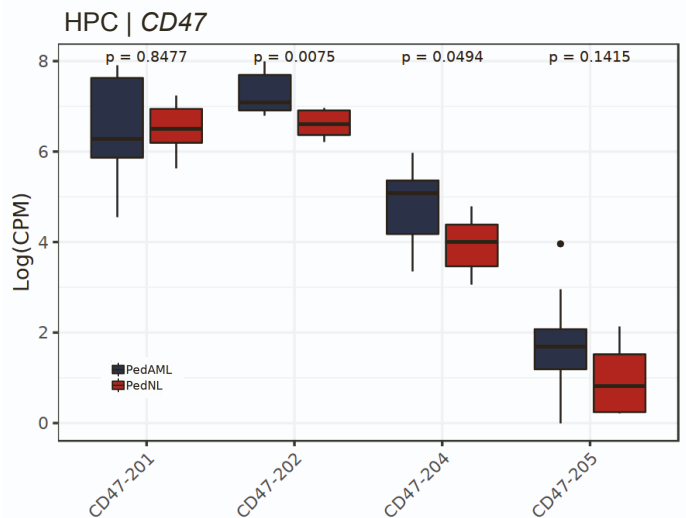



**Figure S4. Differential splicing in pediatric AML hematopoietic stem cells and hematopoietic progenitor cells.**

**Related to Figure 4.**

(A) Schematic of MCL-1 splicing.

(B) Transcript levels of *MCL1-L* based on RNA-seq of hematopoietic stem cells (HSCs) and hematopoietic progenitor cells (HPCs) in pediatric AML (pAML, n=8 biological replicates) and age-matched controls (pNL, n=5 biological replicates), and qRT-PCR of CD34<sup>+</sup> selected cells derived from pAML and cord blood.

(C) RNA-seq-based expression levels of *BCL2-L* in HSCs and HPCs derived from pAML and pNL.

(D) RNA-seq-based expression levels the ratio *ADAR1 p150* to *ADAR1 p110* in HSCs and HPCs derived from pAML and pNL.

(E) Correlation of the ADAR ratio versus the number of edits per million in pAML and pNL HSCs.

(F) Adenosine to inosine (A-I) RNA editing events detected in *PTPN6*.

(G) RNA-seq-based expression levels of *PTPN6-003* in pAML and pNL HSCs and HPCs.

(H) RNA-seq-based expression of splice isoforms of *CD44* in HPCs (\* - p < 0.05; \*\* - p < 0.01; \*\*\* - p < 0.005).

(I) RNA-seq-based quantification of splice isoforms of *CD47* in HPCs.

Figure S5

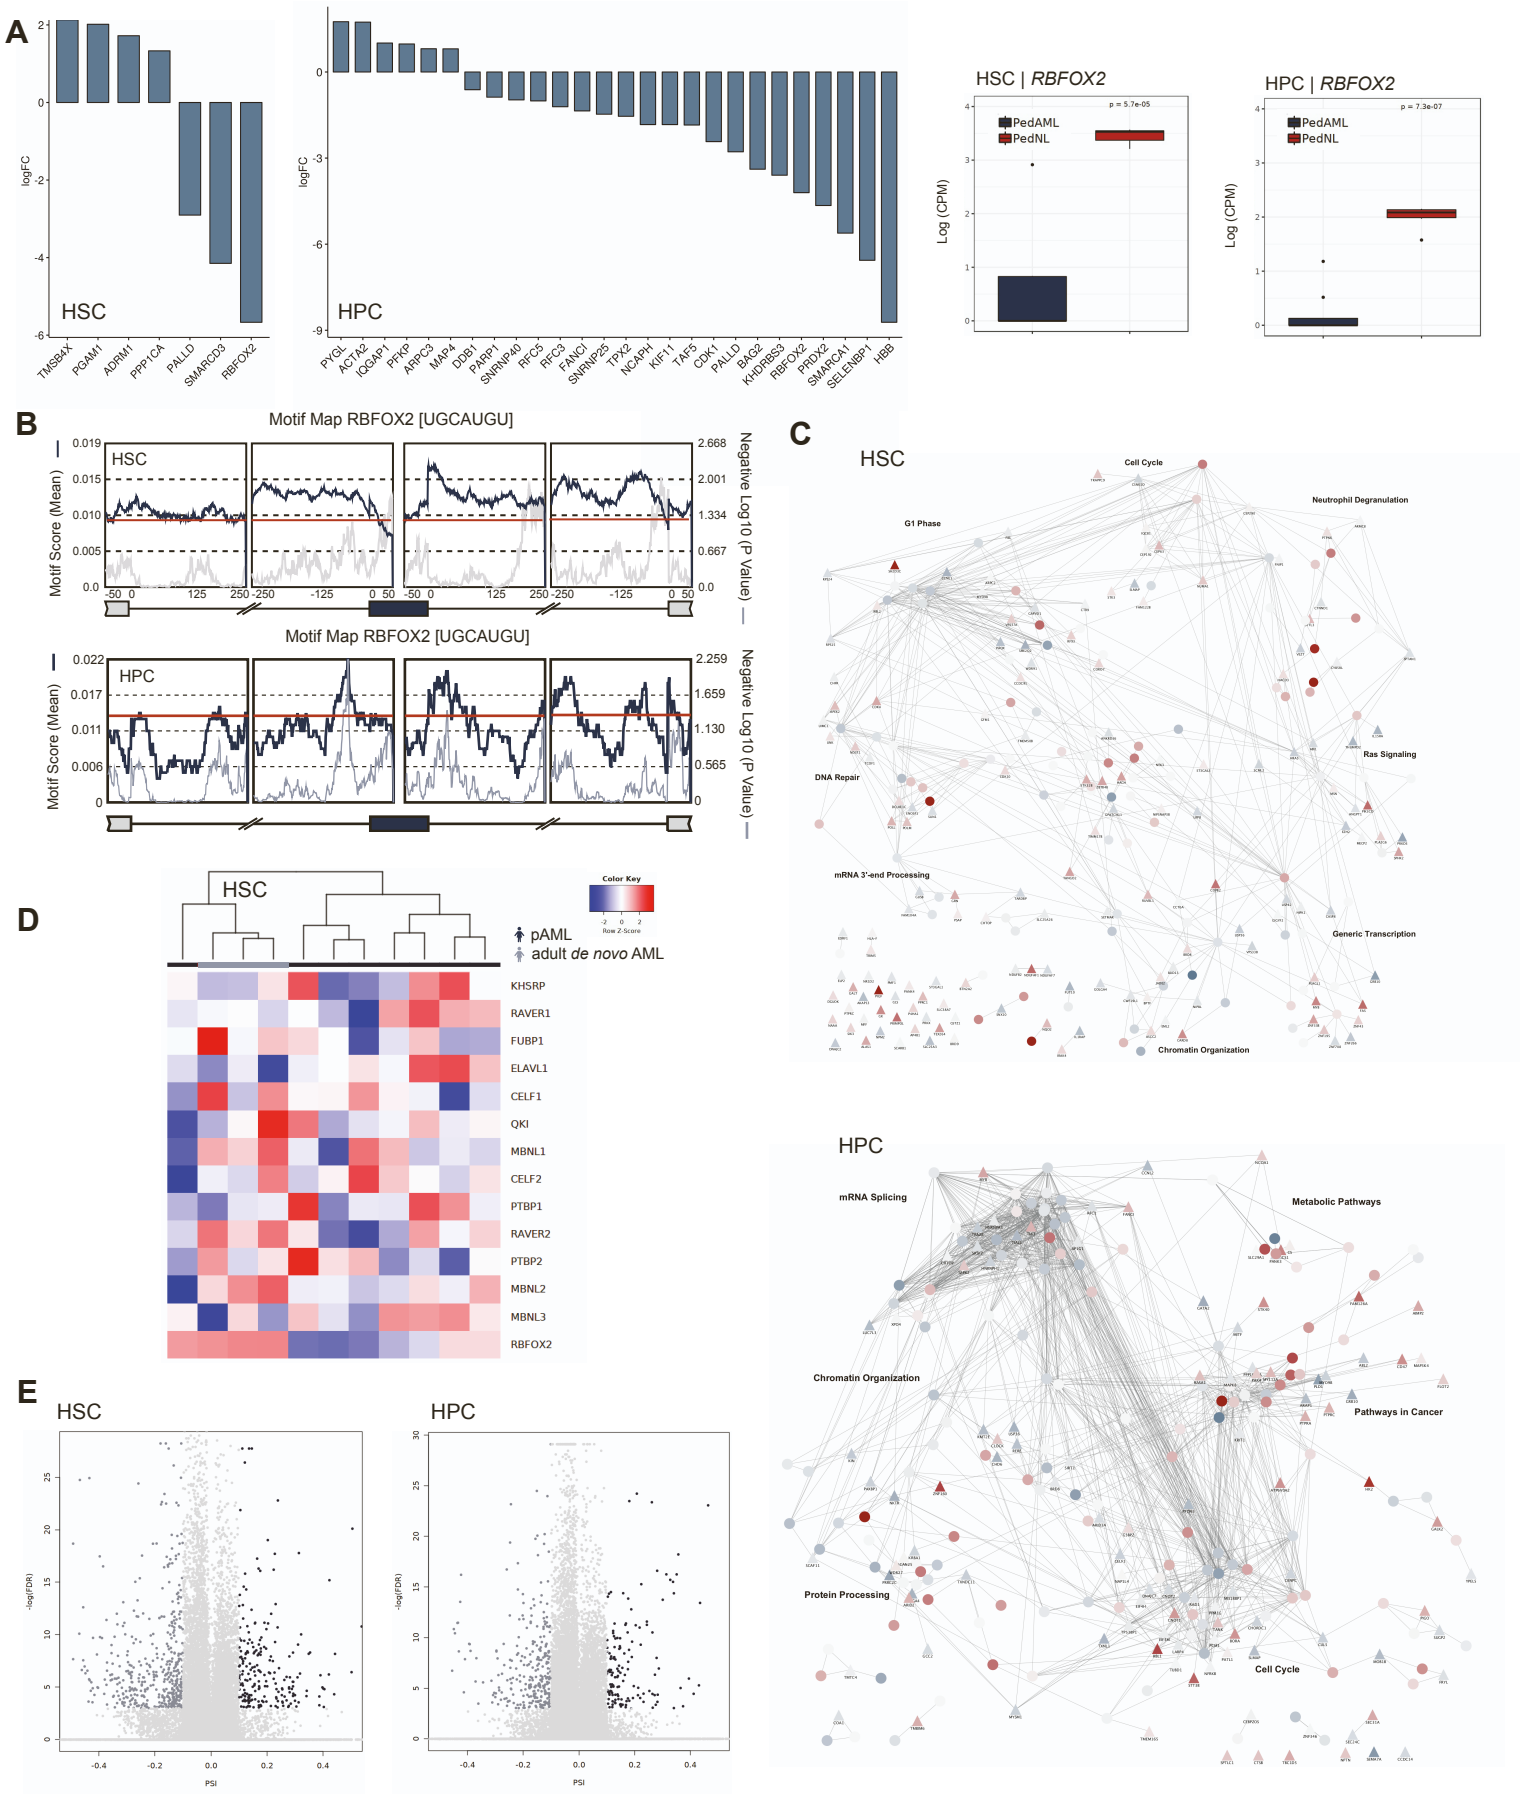

**Figure S5. Decreased expression of RBFOX2 in pediatric AML and LSC survival gene expression.**

**Related to Figure 5.**

(A) RNA-seq based quantification of significant differentially expressed human-specific spliceosome components in hematopoietic stem cells (HSCs) and hematopoietic progenitor cells (HPCs) between pediatric AML (pAML) and pediatric non-leukemic (pNL). Genes with FDR <0.05 are shown (left). RNA-seq quantification of *RBFOX2* transcript levels in HSCs and HPCs. P-values are based on student's t-test (right).

(B) rMAPS motif enrichment analysis output for RBFOX2 consensus binding site for all identified splice isoforms in HSCs (top) and HPCs (bottom; false discovery rate; FDR <0.05, percent spliced in; PSI >0.1). The blue line indicates motif score while the red line indicates Log<sub>10</sub> (p-value), and the grey line represents the background. The RBFOX2 motif score is significantly enriched if Log<sub>10</sub> (p-value) is 1.3, reminiscent of a p-value lower than 0.05.

(C) Network analysis of differentially spliced RBFOX2 target genes in pAML compared to pNL HSCs (left) and HPCs (right). Top 200 exon skipping events in this comparison were used as seeds for network propagation on the STRING high confidence interactome. Differential expression log fold change is mapped to node color. Triangles depict seed list genes and circles present associated genes.

(D) Heatmap of expression levels after unsupervised clustering of RBFOX2 associated splicing factors in pediatric AML versus adult de novo AML derived HSCs.

(E) Volcano plot highlighting RBFOX2 target genes that present differential exon usage in pediatric AML (FDR<0.05, PSI>0,1). A negative PSI reflects exon inclusion in pediatric AML while a positive PSI reflects exon skipping in pediatric AML versus adult AML-derived HSCs (left) and HPCs (right).

Figure S6

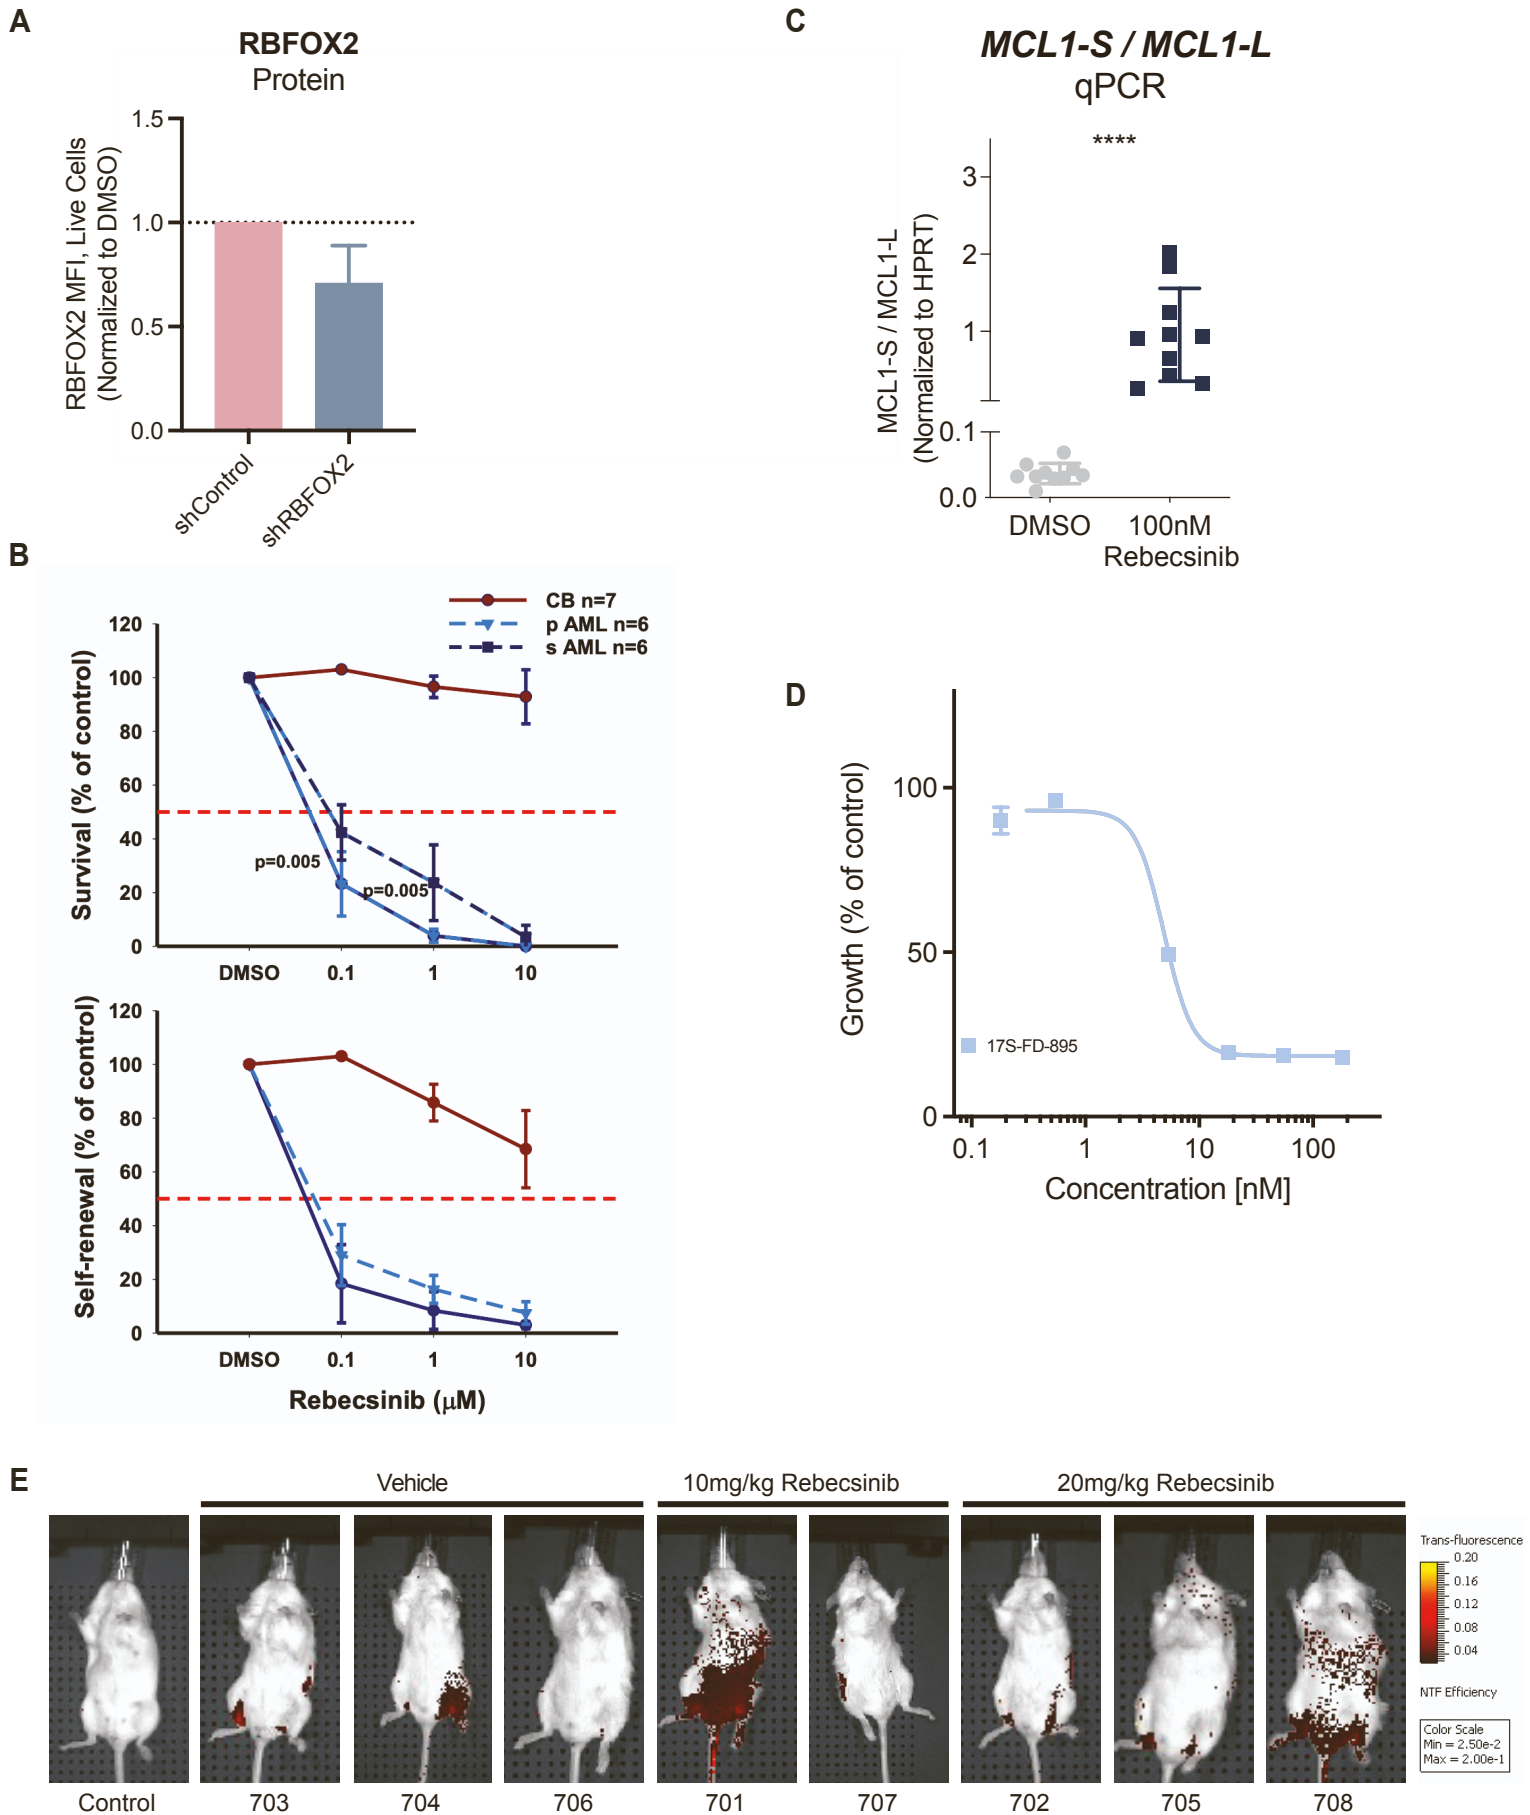

**Figure S6. Rebecsinib-mediated inhibition of pediatric AML *in vitro* and *in vivo*. Related to Figure 6.**

(A) Flow cytometric analysis of RBFOX2 protein levels following lentiviral shControl or lentiviral shRBFOX2 transduction of cord blood derived CD34<sup>+</sup> selected cells for 48h (n=7 biological replicates).

(B) Survival and self-renewal of CD34<sup>+</sup> cells derived from pediatric AML (pAML, n=6 biological replicates), cord blood or adult secondary AML (sAML, n=9 biological replicates) in long-term stromal co-cultures. These data represent the mean +/- SD for each treatment condition. Statistical analysis was performed by one-way ANOVA.

(C) qRT-PCR mRNA expression of the ratio *MCL1-S* to *MCL1-L* in pAML samples treated with 100 nM Rebecsinib; p values are based on the Mann-Whitney U test (n=10 biological replicates).

(D) MTT assay of MOLM13 cells incubated with a range of Rebecsinib (n=3 technical replicates).

(E) Live animal epifluor imaging 24h after Rebecsinib treatment.

**Table S1. Patient Demographics. Related to Figure 1.**

| Sample ID | Gender | Age | Cell Source | Blast % | Diagnosis                       | Cytogenetics        |
|-----------|--------|-----|-------------|---------|---------------------------------|---------------------|
| 488       | M      | 7   | PB          | 100     | AML                             | Missing             |
| 451       | M      | 9   | PB          | 91      | AML                             | Missing             |
| 538       | F      | 14  | PB          | 54      | AML                             | inv(16)             |
| 678       | M      | 1   | PB          | 21      | AML                             | inv(16)             |
| 868       | M      | 2   | PB          | 90      | AML                             | t(15;17)            |
| 266       | F      | 11  | BM          | 65      | AML                             | CEBPA               |
| 390       | M      | 12  | BM          | 54      | AML                             | t(8;21)             |
| 379       | F      | 3   | PB          | 91      | AML                             | Missing             |
| 584       | M      | 14  | PB          | 52      | AML                             | Missing             |
| 177       | M      | 3   | BM          | 30      | AML                             | t(8;21)             |
| 1474      | M      | 52  | PB          | 83      | de novo AML                     | inv(16), KIT, NRAS  |
| 251       | F      | 32  | BM          | 32      | de novo AML                     | inv(16), NRAS, KRAS |
| 023       | M      | 52  | BM          | 56      | de novo AML                     | CEBPA, NRAS, WT1    |
| 220       | M      | 44  | BM          | 37      | de novo AML                     | MLL-PTD, STAG2      |
| 682       | M      | 61  | BM          | 34      | de novo AML                     | t(8;21)             |
| 747       | F      | 7   | BM          | NA      | Complete Remission              | NA                  |
| 677       | F      | 7   | BM          | NA      | Healthy Donor                   | NA                  |
| 720       | F      | 8   | BM          | NA      | Healthy Donor                   | NA                  |
| 760       | M      | 1   | BM          | NA      | Lymphoma without BM involvement | NA                  |
| 474       | M      | 11  | BM          | NA      | Lymphoma without BM involvement | NA                  |
| 376       | M      | 8   | BM          | NA      | Lymphoma without BM involvement | NA                  |

Male (M); Female (F); Age in years; Bone marrow (BM); Peripheral blood (PB); Acute myeloid leukemia (AML)

**Table S4. Primer Sequences. Related to Figure 6.**

| Transcript | Species | Primer FW sequence (5'-3') | Primer REV sequence (5'-3') |
|------------|---------|----------------------------|-----------------------------|
| HPRT       | Human   | TCAGGGATTTGAATCATGTTTGTG   | CGATGTCAATAGGACTCCAGATG     |
| MCL1-L     | Human   | AGACCTTACGACGGGTTGG        | AATCCTGCCCCAGTTTGTTA        |
| MCL1-S     | Human   | GAGGAGGACGAGTTGTACCG       | ACTCCACAAACCCATCCTTG        |
